# Supplementary material for: Macrophage Migration Is Impaired within Candida albicans Biofilms
Source: MDPI journal article supplement (doi:10.3390/jof3030031), 2017-06-22
Supplement: s1 [file s1]

## Supplementary data

**Supplementary Video S1.** (.wmv) represents 60 min of interaction of J774.1 macrophages with *C. albicans* strain CAI4 at ×40 objective magnification.

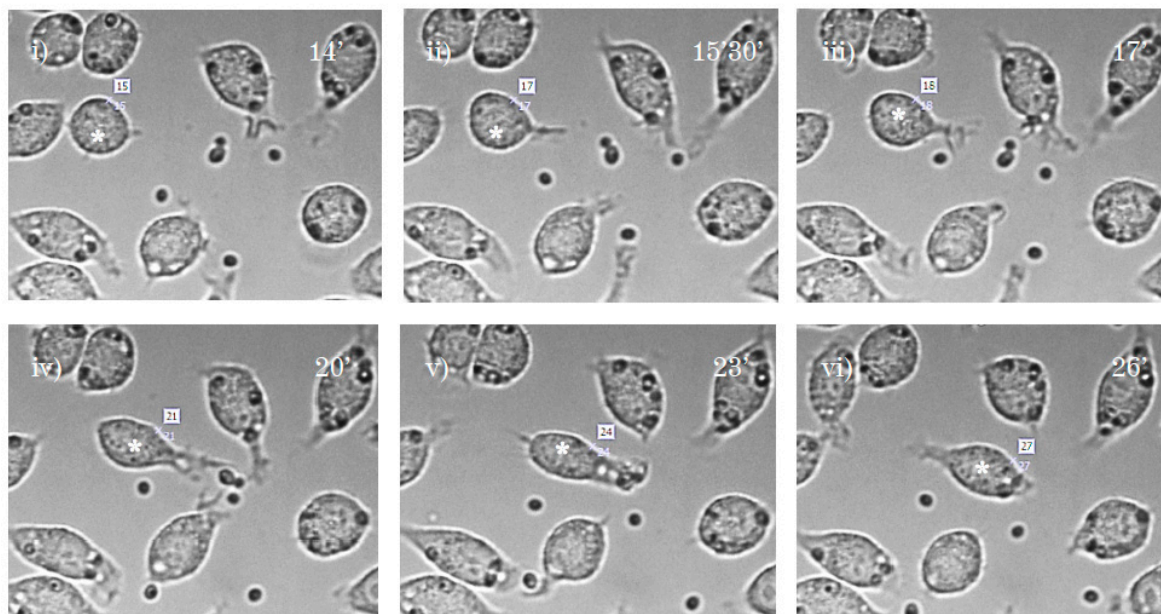

**Supplementary Figure S1.** Macrophage migration and engulfment of wildtype *C. albicans*. Images i-vi) are from live cell video microscopy (DIC ×20 objective) capturing the migration and engulfment processes. Image i) shows a macrophage (\*) and *C. albicans* prior to cell-to-cell contact. Images ii) and iii) show macrophage polarization towards the *Candida* target. Images iv) and v) show the same cells during contact and the beginning of the engulfment process. Image vi) shows *C. albicans* within the macrophage post-engulfment. Absolute times (min) are indicated on the upper right margin of the images. White boxes reflect the manual tracking process.

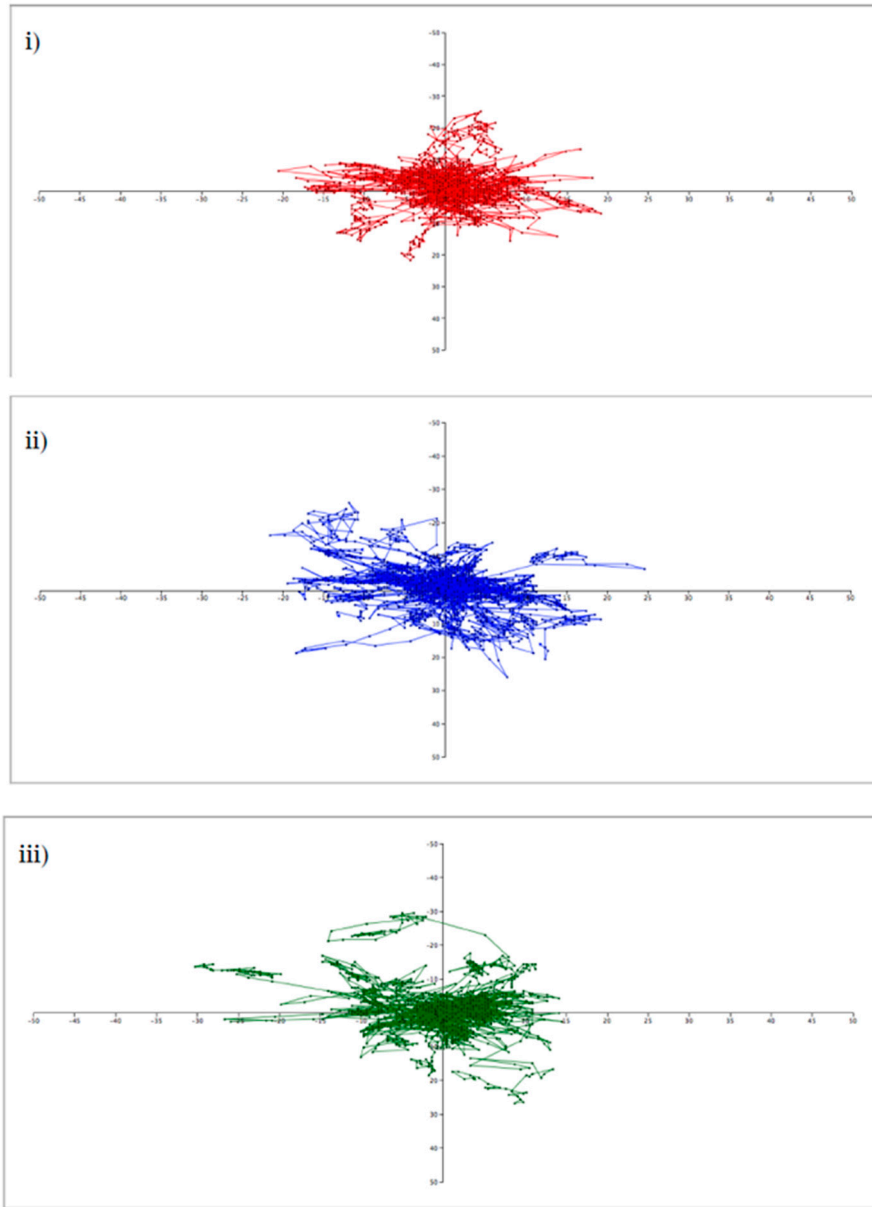

**Supplementary Figure S2.** Representative macrophage tracking diagrams. The tracking diagrams shown in i), ii) and iii) illustrate the distances travelled, directionality and velocity of J774.1 macrophages cultured with wildtype, *mnt1Δmnt2Δ* mutant strain and *mnt1Δmnt2Δ*+*MNT1* reintegrand strain, respectively. Each track represents the movement of an individual macrophage relative to its starting position, symbols indicate the location of macrophages at 90 sec intervals for 1 hour and arrows represent directionality.

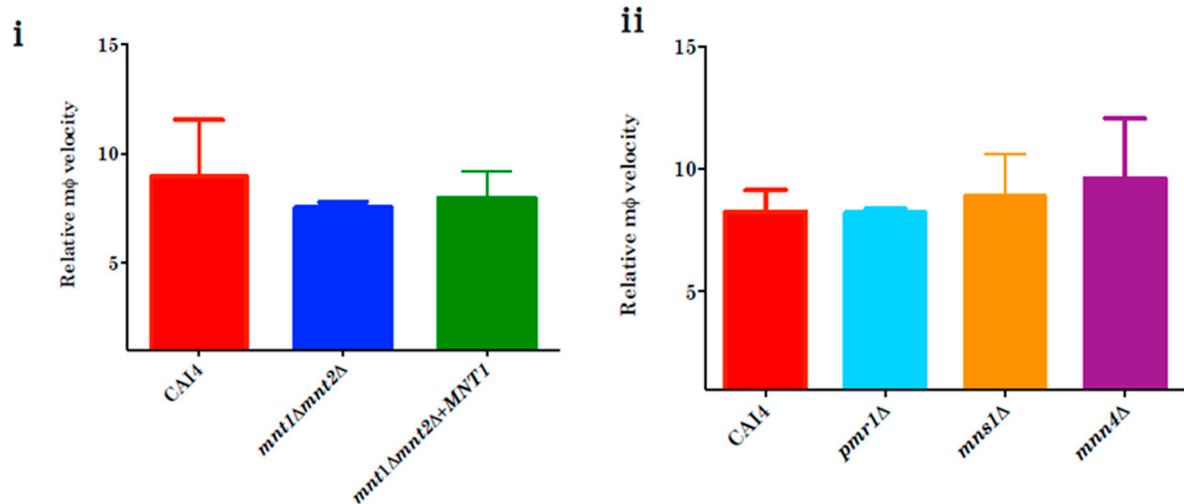

**Supplementary Figure S3.** Maximum relative macrophage velocities for wildtype and glycosylation mutants. The charts show mean maximum relative macrophage velocity (relative to macrophage velocity without *Candida*) + SD of J774.1 macrophages in response to i) CAI4, *mnt1Δmnt2Δ* and *mnt1Δmnt2Δ+MNT1* and ii) CAI4, *pmr1Δ*, *mns1Δ* and *mnn4Δ* at 1 h of analysis. Higher velocities represent instances of active macrophage chase of fungal cells. Statistical significance was evaluated using a one-way analysis of variance (ANOVA) and Tukey Multiple Analysis Comparison Tests. No statistically significant difference was observed in any of the cases (n=3).

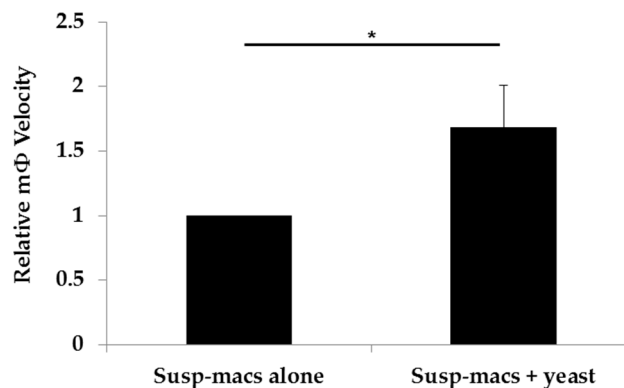

**Supplementary Figure S4.** Relative migration of suspension macrophages is increased in response to live fungi. The charts show mean relative macrophage velocity +SD in the presence of CAI4 relative to macrophage velocity of J774.1 macrophages over a 30 min period. Statistical significance was evaluated using Student's t-test: \*,  $p < 0.05$ .
